# Supplementary material for: Thickness-Dependence Electrical Characterization of the One-Dimensional van der Waals TaSe3 Crystal
Source: Materials (Basel). 2019 Aug 2;12(15):2462. doi: 10.3390/ma12152462 (PMC6695938; doi:10.3390/ma12152462)
Supplement: Supplementary file 1 [file materials-12-02462-s001.pdf]

## Supplementary

# Thickness-Dependence Electrical Characterization of the One-Dimensional van der Waals TaSe<sub>3</sub> Crystal

Bum Jun Kim <sup>1,†</sup>, Byung Joo Jeong <sup>2,†</sup>, Seungbae Oh <sup>2</sup>, Sudong Chae <sup>2</sup>, Kyung Hwan Choi <sup>1</sup>, Tuqeer Nasir <sup>1</sup>, Sang Hoon Lee <sup>2</sup>, Hyung Kyu Lim <sup>2</sup>, Ik Jun Choi <sup>2</sup>, Min-Ki Hong <sup>3</sup>, Hak Ki Yu <sup>3</sup>, Jae-Hyun Lee <sup>3,\*</sup> and Jae-Young Choi <sup>1,2,\*</sup>

<sup>1</sup> SKKU Advanced Institute of Nanotechnology (SAINT), Sungkyunkwan University, Suwon 16419, Korea

<sup>2</sup> School of Advanced Materials Science & Engineering, Sungkyunkwan University, Suwon 16419, Korea

<sup>3</sup> Department of Materials Science and Engineering, Department of Energy Systems Research, Ajou University, Suwon 16499, Korea

\* Correspondence: jaehyunlee@ajou.ac.kr (J.-H.L.); jy.choi@skku.edu (J.-Y.C.)

† These authors contributed equally to this study

Received: 16 June 2019; Accepted: 30 July 2019; Published: 2 August 2019

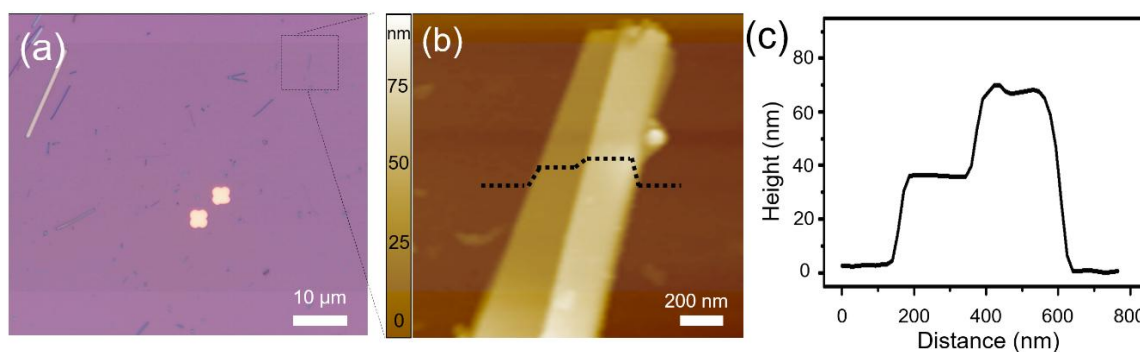

**Figure S1.** (a) OM and (b) AFM image of exfoliated TaSe<sub>3</sub> flakes on 300 nm SiO<sub>2</sub>/Si substrate. (c) Line profile of the corresponding TaSe<sub>3</sub> flake, as marked in (b).

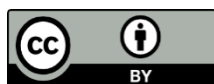

© 2019 by the authors. Licensee MDPI, Basel, Switzerland. This article is an open access article distributed under the terms and conditions of the Creative Commons Attribution (CC BY) license (<http://creativecommons.org/licenses/by/4.0/>).
